# Supplementary material
Source: HighWire-hosted journal article supplement (https://www.cmajopen.ca/highwire/filestream/88752/field_highwire_adjunct_files/0/open-2021-0258-1-at.pdf)
Supplement: open-2021-0258-1-at.pdf [file open-2021-0258-1-at.pdf]

**Appendix 1. Chronic diseases : case definition algorithms and validation studies.**

| Chronic disease category | Chronic disease                 | Algorithms                                                                                                                                                                                                                                                                                                                                                                                                                                                                                                                                                                                                                                                                                                                                                                                                                                                                                                                                                           | CODES                                                                                                                                                                    |                                                                                                                                                     |                  |                       | Validation studies |             |       |       |                                                                                                                           |                                                   |  |
|--------------------------|---------------------------------|----------------------------------------------------------------------------------------------------------------------------------------------------------------------------------------------------------------------------------------------------------------------------------------------------------------------------------------------------------------------------------------------------------------------------------------------------------------------------------------------------------------------------------------------------------------------------------------------------------------------------------------------------------------------------------------------------------------------------------------------------------------------------------------------------------------------------------------------------------------------------------------------------------------------------------------------------------------------|--------------------------------------------------------------------------------------------------------------------------------------------------------------------------|-----------------------------------------------------------------------------------------------------------------------------------------------------|------------------|-----------------------|--------------------|-------------|-------|-------|---------------------------------------------------------------------------------------------------------------------------|---------------------------------------------------|--|
|                          |                                 |                                                                                                                                                                                                                                                                                                                                                                                                                                                                                                                                                                                                                                                                                                                                                                                                                                                                                                                                                                      | ICD-9 <sup>2</sup>                                                                                                                                                       | ICD-10                                                                                                                                              | Treatment        | Pharmaceutical claims | Sensitivity        | Specificity | NPV   | PPV   | Reference                                                                                                                 |                                                   |  |
| Diabetes                 | Diabetes<br>(Québec definition) | At least 2 diagnostic codes for diabetes in the medical claims within 2 years<br>OR<br>At least 1 diagnostic code for diabetes in the hospital discharges                                                                                                                                                                                                                                                                                                                                                                                                                                                                                                                                                                                                                                                                                                                                                                                                            |                                                                                                                                                                          |                                                                                                                                                     |                  |                       |                    |             |       |       |                                                                                                                           |                                                   |  |
|                          |                                 | <p><b>Exclusions :</b><br/> <b>Women 10-54 years old :</b><br/>                     1) Diabetes codes in the 120 days before and 180 days after a hospital admission in obstetrics.<br/>                     Hospital discharges : ICD-9 : 641-676, V27;<br/>                     ICD-10 : O1, O21-95, O98, O99, Z37.<br/>                     2) Diabetes codes in the 180 days after a claim for a consultation related to a pregnancy or an echography.</p> <p>Claims : 00059, 00679, 09138, 09156, 09157, 09166, 09167, 15117, 15108, 15109, 15110, 15111, 15124, 15125, 15126, 15127, 15129, 15141, 15144, 15145, 15159, 01679, 01680, 01681, 01682, 01684, 01685, 16086, 16087, 08312, 08314, 08317, 08318, 08319, 08323, 08324, 08339, 00067, 00072, 00073, 00076, 00077, 06773, 06911, 09066;</p> <p><b>Women 15-44 years old :</b><br/>                     Diabetes codes for an orally provoked hyperglycemia.<br/>                     Claim : 00761</p> | 250                                                                                                                                                                      | E10-E14                                                                                                                                             |                  |                       | 68-95              | 97-99.9     | 99.9  | 66-88 | Hux JE, Diabete Care, 2002<br>Southern DA, CanJPublicHealth, 2010<br>Ouhoummane N, Thèse, 2010<br>Dart AB, DiabCare, 2011 |                                                   |  |
|                          | Hypertension                    | At least 2 diagnostic codes for hypertension in the medical claims within 2 years<br>OR<br>At least 1 diagnostic code for hypertension in the hospital discharges (≥ 20 years old)                                                                                                                                                                                                                                                                                                                                                                                                                                                                                                                                                                                                                                                                                                                                                                                   | 401-405                                                                                                                                                                  | I10-I13, I15                                                                                                                                        |                  |                       |                    | 72-75       | 94-95 | 88-92 | 81-87                                                                                                                     | Tu K, OpenMed, 2007<br>Quan H, Hypertension, 2009 |  |
| Cardiovascular disease   | Ischemic heart disease          | At least 2 diagnostic codes for ischemic heart disease in the medical claims within a year<br>OR<br>At least 1 diagnostic code or 1 treatment code for ischemic heart disease in the hospital discharges. (≥ 20 years old)                                                                                                                                                                                                                                                                                                                                                                                                                                                                                                                                                                                                                                                                                                                                           | 410-414                                                                                                                                                                  | I20-I25                                                                                                                                             | CCADTC*<br>48.02 | CCI†<br>1.IJ.50       |                    | 77          | 98    | 98    | 75                                                                                                                        | Tu K, CanJCardio, 2010                            |  |
|                          |                                 |                                                                                                                                                                                                                                                                                                                                                                                                                                                                                                                                                                                                                                                                                                                                                                                                                                                                                                                                                                      |                                                                                                                                                                          |                                                                                                                                                     | 48.11-<br>48.19  | 1.IJ.54<br>1.IJ.76    |                    |             |       |       |                                                                                                                           |                                                   |  |
|                          | Heart failure                   | At least 2 diagnostic codes for heart failure in the medical claims within a year<br>OR<br>At least 1 diagnostic code for heart failure in the hospital discharges (≥ 40 years old)                                                                                                                                                                                                                                                                                                                                                                                                                                                                                                                                                                                                                                                                                                                                                                                  | 428                                                                                                                                                                      | I50                                                                                                                                                 |                  |                       |                    | 61-85       | 97-99 | -     | 56-66                                                                                                                     | Schultz SE, CDIC, 2013                            |  |
|                          | Stroke                          | At least 2 diagnostic codes for stroke in the medical claims within a year<br>OR<br>At least 1 diagnostic code for stroke in the hospital discharges (≥ 20 years old)                                                                                                                                                                                                                                                                                                                                                                                                                                                                                                                                                                                                                                                                                                                                                                                                | Hospital data : '3623', '430', '431', '43301', '43311', '43321', '43331', '43381', '43391', '434.x1', '435', '436'<br>Medical claims : '430', '431', '434', '435', '436' | 'G450', 'G451', 'G452', 'G453', 'G458', 'G459', 'H340', 'H341', 'I60', 'I61', 'I630', 'I631', 'I632', 'I633', 'I634', 'I635', 'I638', 'I639', 'I64' |                  |                       |                    | 68          | 99    | 99    | 66                                                                                                                        | Tu K, CanJCardio, 2013                            |  |

| Chronic disease category | Chronic disease                       | Algorithms                                                                                                                                                                                                                                                                                                                                    | CODES                                                                                    |                          |                                                                                                                                                                                                                                                                                                                                                                                                                                                                                                                                                                                                                                                                                                                                                                                                                                                                                                                                                                                                                                                                                                                        | Validation studies    |             |             |     |                       |                                |
|--------------------------|---------------------------------------|-----------------------------------------------------------------------------------------------------------------------------------------------------------------------------------------------------------------------------------------------------------------------------------------------------------------------------------------------|------------------------------------------------------------------------------------------|--------------------------|------------------------------------------------------------------------------------------------------------------------------------------------------------------------------------------------------------------------------------------------------------------------------------------------------------------------------------------------------------------------------------------------------------------------------------------------------------------------------------------------------------------------------------------------------------------------------------------------------------------------------------------------------------------------------------------------------------------------------------------------------------------------------------------------------------------------------------------------------------------------------------------------------------------------------------------------------------------------------------------------------------------------------------------------------------------------------------------------------------------------|-----------------------|-------------|-------------|-----|-----------------------|--------------------------------|
|                          |                                       |                                                                                                                                                                                                                                                                                                                                               | ICD-9 <sup>2</sup>                                                                       | ICD-10                   | Treatment                                                                                                                                                                                                                                                                                                                                                                                                                                                                                                                                                                                                                                                                                                                                                                                                                                                                                                                                                                                                                                                                                                              | Pharmaceutical claims | Sensitivity | Specificity | NPV | PPV                   | Reference                      |
| Respiratory disease      | Asthma                                | At least 2 diagnostic codes for asthma in the medical claims within 2 years<br>OR<br>At least 1 diagnostic code for asthma in the hospital discharges                                                                                                                                                                                         | 493                                                                                      | J45, J46                 |                                                                                                                                                                                                                                                                                                                                                                                                                                                                                                                                                                                                                                                                                                                                                                                                                                                                                                                                                                                                                                                                                                                        |                       | 84          | 77          | 91  | 62                    | Gershon AS, Can RespirJ., 2009 |
|                          | Chronic obstructive pulmonary disease | At least 1 diagnostic code for COPD in the medical claims<br>OR<br>At least 1 diagnostic code for COPD in the hospital discharges (≥ 35 years old)                                                                                                                                                                                            | 491,492, 496                                                                             | J41-J44                  |                                                                                                                                                                                                                                                                                                                                                                                                                                                                                                                                                                                                                                                                                                                                                                                                                                                                                                                                                                                                                                                                                                                        |                       | 85          | 78          | 94  | 58                    | Gershon AS, COPD, 2009         |
| Mental disorders         | Mental disorders                      | At least 1 diagnostic code for a mental disorder in the medical claims<br>OR<br>At least 1 diagnostic code for a mental disorder in the hospital discharges (≥ 1 year old)                                                                                                                                                                    | 290-319                                                                                  | F00-F99                  |                                                                                                                                                                                                                                                                                                                                                                                                                                                                                                                                                                                                                                                                                                                                                                                                                                                                                                                                                                                                                                                                                                                        |                       | -           | -           | -   | -                     | Lesage A, INSPQ, 2012          |
|                          | Mental disorders                      | RE-EVALUATED EVERY YEAR.<br>At least 3 diagnostic code for Alzheimer's disease or a similar disorder in the medical claims (≥ 40 years old)<br>OR<br>At least 1 diagnostic code for Alzheimer's disease or a similar disorder in the hospital discharges (≥ 40 year old)<br>OR<br>Pharmaceutical claim for a drug against Alzheimer's disease | Medical claims : 290, 294, 331, 046.1.<br><br>Hospital data : 290,294,331.0, 331.1,331.5 | G30, F00, F01, F02, F03. | DIN codes: '02232043','02232044','02269457','02269465','82232044','02244298','02244299','02244300','02266717','02266725','02266733','02316943','02316951','02316978','02339439','02339447','02339455','82244299','82244300','02244302','02270773','02270781','02270803','02293021','02293048','02293056','02295229','02295237','02295245','02333376','02333384','02333392','02377950','02377969','02377977','02260638','02320908','02321130','02324059','02324067','02344807','02348950','02349116','02366487','02305984','02305992','02306018','02306026','02306034','02306042','02306050','02306069','02307685','02307693','02307707','02307715','02308169','02308177','02308185','02308193','02308622','02308630','02308649','02308657','02311283','02311291','02311305','02311313','02312492','02312506','02312514','02312522','02332809','02332817','02332825','02332833','02336715','02336723','02336731','02336758','02375729','02375737','02375745','02375753','02242115','02242116','02242117','02242118','02245240','02302845','02302853','02324563','02324571','02324598','02324601','82242115','82242116'. | -                     | -           | -           | -   | Lesage A, INSPQ, 2012 |                                |

Note : In Québec, the 9th edition of the International classification of diseases (ICD) is used in the medical claims database and it was used in the hospital discharges database until March 2006. ICD-10 is used for the deaths registry and it has been used in the hospital discharges database since April 2006.

\*CCADTC : Classification canadienne des actes diagnostiques, thérapeutiques et chirurgicaux, in the hospital discharges database until March 2006.

† CCI : Classification canadienne des interventions en santé, in the hospital discharges database starting in April 2006.

#### References

- Dart A. B. Martens P.J. Sellers E.A. Brownell M.D. Rigatto C.R. Dean H.J., Validation of a pediatric diabetes case definition using administrative health data in Manitoba, Canada. *Diabetes Care* 2011; 34(4): 898-903.
- Gershon A.S. Wang C. Guan J. Vasilevsk-Ritovska J. Cicutto L. To T., Identifying patients with physician-diagnosed asthma in health administrative databases. *Can Respir Journal* 2009; 16(6): 183-188
- Gerson A.S. Wang C. Guan J. Vasilvska-Ritovska J. Cicutte L. To T., Identifying individuals with physician diagnosed COPD in health administrative databases. *Journal of COPD* 2009; 6: 388-394
- Hux J.E. Flintoft V. Ivis F. Bica A., Determination of prevalence and incidence using a validated administrative data algorithm. *Diabetes care* 2002; 25(3): 512-516
- Ouhoumane N. et Émond V., Hospitalisation et décès après infarctus du myocarde chez les personnes diabétiques : mesures produites dans le cadre du développement du système québécois de surveillance du diabète. *INSPQ 2005*
- Ouhoumane N. Abdous B. Louchini R. Rochette L. Poirier P., Trends in postacute myocardial infarction management and mortality in patients with diabetes. A population-based study from 1995 to 2001. *Can J Cardiol.* 2010; 26(10): 523-31
- Ouhoumane N. Abdous B. Émond V. Poirier P. Impact of diabetes and gender on survival after acute myocardial infarction in the Province of Quebec, Canada – A population-based study. *DiabetMed* 2009; 26(6): 609-16
- Quan H. Khan N. Hemmelgarn B.R. Tu K. Chen G. Campbell N. Hill M.D. Ghali W.A. McAlister F.A., Validation of a case definition to define hypertension using administrative data. *Hypertension* 2009; 54: 1423-1428
- Schultz S.E. Rothwell D.M. Chen Z. Tu K., Identifying cases of congestive heart failure from administrative data: a validation study using primary care patient records, *Chronic Diseases and Injuries in Canada* 2013; 33(3): 160-166
- Southern D.A. Roberts B. Edwards A. Dean S. Norton P. Svenson L.W. Larsen E. Sargious P. Lau D.C.W. Ghali W.A., Validity of administrative data claim-based methods for identifying individuals with diabetes at a population level. *Can. J Public Health* 2010; 101(1): 61-64
- Tu K. Mitiku T. Lee D.S. Guo H., Validation of physician billing and hospitalization data to identify patients with ischemic heart disease using data from the Electronic Medical Record Administrative date Linked Database (EMRALD), *Can J Cardio* 2010; 26(7): e225-e228
- Tu K. Wang M. Young J. Green D. Ivers N.M. Butt D. Jaakkimainen L. Kapral M.K., Validity of administrative data for identifying patients who have had a stroke or transient ischemic attack using EMRALD as a reference standard, *Can J Cardio* 2013; 29(11): 1388-94
- Tu K. Campbell N.R.C. Chen Z. Cauch-Dudek K.J. McAlister F.A., Accuracy of administrative databases in identifying patients with hypertension, *Open Medicine* 2007; 1(1): e18-e26
